# Supplementary material for: Infection Rates of Fasciola Intermediate Host Snail Species and Their Distribution in Africa: A Systematic Review and Meta-Analysis
Source: MDPI journal article supplement (doi:10.3390/tropicalmed8100467), 2023-10-06
Supplement: s1 [file s1]

**Quality assessment of the articles included.**

The Joanna Briggs Institute Critical Appraisal Tool for studies reporting prevalence data was used to assess the quality of all studies included in the review. The following questions were assessed using the tool assessed the about the articles:

1. sample representative of the target population,
2. study participants recruited in an appropriate way,
3. sample size adequate
4. study subjects and setting described in detail
5. data analysis conducted with sufficient coverage of the identified sample
6. objective standard criteria used for measurement of the condition
7. condition measured reliably,
8. appropriate statistical analysis,
9. important confounding factors/ subgroups/differences identified and accounted for,
10. subpopulations identified using objective criteria.

| First Author and Year           | Was the sample representative of the target population? | Were study participants recruited in an appropriate way? | Was the sample size adequate? | Were the study subjects and setting described in detail? | Is the data analysis conducted with sufficient coverage of the identified sample? | Were objective, standard criteria used for measurement of the condition? | Was the condition measured reliably? | Was there appropriate statistical analysis? | Are all important confounding factors/ subgroups/differences identified and accounted for? | Were subpopulations identified using objective criteria? | Quality score |
|---------------------------------|---------------------------------------------------------|----------------------------------------------------------|-------------------------------|----------------------------------------------------------|-----------------------------------------------------------------------------------|--------------------------------------------------------------------------|--------------------------------------|---------------------------------------------|--------------------------------------------------------------------------------------------|----------------------------------------------------------|---------------|
| Ibrahim and Ahmed. (2019)       | Yes                                                     | Yes                                                      | Yes                           | Yes                                                      | Yes                                                                               | Yes                                                                      | Yes                                  | Yes                                         | Yes                                                                                        | Yes                                                      | 10            |
| Ashour et al. (2008)            | Yes                                                     | Yes                                                      | Yes                           | Yes                                                      | Yes                                                                               | Yes                                                                      | Yes                                  | Yes                                         | Yes                                                                                        | Yes                                                      | 10            |
| El Shazly et al. (2002)         | Yes                                                     | Yes                                                      | Yes                           | Yes                                                      | Yes                                                                               | Yes                                                                      | Yes                                  | Yes                                         | No                                                                                         | Yes                                                      | 9             |
| Ahmed and Ramzy (1999)          | Yes                                                     | Yes                                                      | Yes                           | Yes                                                      | Yes                                                                               | Yes                                                                      | Yes                                  | Yes                                         | Yes                                                                                        | Yes                                                      | 10            |
| Bushara and Majid. (2001)       | Yes                                                     | Yes                                                      | Yes                           | Yes                                                      | Yes                                                                               | Yes                                                                      | Yes                                  | Yes                                         | No                                                                                         | Yes                                                      | 9             |
| Califa and Mas-Coma. (2005)     | Yes                                                     | Yes                                                      | Yes                           | Yes                                                      | Yes                                                                               | Yes                                                                      | Yes                                  | Yes                                         | Yes                                                                                        | Yes                                                      | 10            |
| Kele and Attah. (2022)          | Yes                                                     | Yes                                                      | Yes                           | Yes                                                      | Yes                                                                               | Yes                                                                      | Yes                                  | Yes                                         | Yes                                                                                        | Yes                                                      | 10            |
| Bagbe (2017)                    | Yes                                                     | Yes                                                      | Yes                           | Yes                                                      | Yes                                                                               | Yes                                                                      | Yes                                  | Yes                                         | Yes                                                                                        | Yes                                                      | 10            |
| Luka and Mbaya. (2015)          | Yes                                                     | Yes                                                      | Yes                           | Yes                                                      | Yes                                                                               | Yes                                                                      | Yes                                  | Yes                                         | Yes                                                                                        | Yes                                                      | 10            |
| Mailkaje and Umar. (2018)       | Yes                                                     | Yes                                                      | Yes                           | Yes                                                      | Yes                                                                               | Yes                                                                      | Yes                                  | Yes                                         | Yes                                                                                        | Yes                                                      | 10            |
| Mereta et al. (2019)            | Yes                                                     | Yes                                                      | Yes                           | Yes                                                      | Yes                                                                               | Yes                                                                      | Yes                                  | Yes                                         | Yes                                                                                        | Yes                                                      | 10            |
| Phiri et al. (2007)             | Yes                                                     | Yes                                                      | Yes                           | Yes                                                      | Yes                                                                               | Yes                                                                      | Yes                                  | Yes                                         | Yes                                                                                        | Yes                                                      | 10            |
| Nkwengulila and Kigadye. (2005) | Yes                                                     | Yes                                                      | Yes                           | Yes                                                      | Yes                                                                               | Yes                                                                      | Yes                                  | Yes                                         | Yes                                                                                        | Yes                                                      | 10            |
| Deribew et al. (2020)           | Yes                                                     | Yes                                                      | Yes                           | Yes                                                      | Yes                                                                               | Yes                                                                      | Yes                                  | Yes                                         | Yes                                                                                        | Yes                                                      | 10            |
| Righi, et al. (2016)            | Yes                                                     | Yes                                                      | Yes                           | Yes                                                      | Yes                                                                               | Yes                                                                      | Yes                                  | Yes                                         | No                                                                                         | Yes                                                      | 9             |
| Hammami, et al. (2007)          | Yes                                                     | Yes                                                      | Yes                           | Yes                                                      | Yes                                                                               | Yes                                                                      | Yes                                  | Yes                                         | Yes                                                                                        | Yes                                                      | 10            |
| Arafa et al. (2018)             | Yes                                                     | Yes                                                      | Yes                           | Yes                                                      | Yes                                                                               | Yes                                                                      | Yes                                  | Yes                                         | Yes                                                                                        | Yes                                                      | 10            |
| El Shazly, et al. (2002)        | Yes                                                     | Yes                                                      | Yes                           | Yes                                                      | Yes                                                                               | Yes                                                                      | Yes                                  | Yes                                         | No                                                                                         | Yes                                                      | 9             |
| Mekroud, et al. (2004)          | Yes                                                     | Yes                                                      | Yes                           | Yes                                                      | Yes                                                                               | Yes                                                                      | Yes                                  | Yes                                         | Yes                                                                                        | Yes                                                      | 10            |
| Malatji and Mukaratirwa (2020)  | Yes                                                     | Yes                                                      | Yes                           | Yes                                                      | Yes                                                                               | Yes                                                                      | Yes                                  | Yes                                         | Yes                                                                                        | Yes                                                      | 10            |
| Ahmed and Ramzy (1999)          | Yes                                                     | Yes                                                      | Yes                           | Yes                                                      | Yes                                                                               | Yes                                                                      | Yes                                  | Yes                                         | Yes                                                                                        | Yes                                                      | 10            |
| Grabner et al. (2014)           | Yes                                                     | Yes                                                      | Yes                           | Yes                                                      | Yes                                                                               | Yes                                                                      | Yes                                  | Yes                                         | No                                                                                         | Yes                                                      | 9             |
| El Shazly et al. (2002)         | Yes                                                     | Yes                                                      | Yes                           | Yes                                                      | Yes                                                                               | Yes                                                                      | Yes                                  | Yes                                         | No                                                                                         | Yes                                                      | 9             |
